# Supplementary material for: Targeting G1/S phase cell-cycle genomic alterations and accompanying co-alterations with individualized CDK4/6 inhibitor–based regimens
Source: JCI journal article supplement (doi:10.1172/jci.insight.142547), 2021-01-10
Supplement: sd1 [file 1]

**Abbreviations:** CI, confidence interval; ECOG PS, Eastern Cooperative Oncology Group Performance Status; HR, hazard ratio; PFS, progression-free survival.

## Supplemental Methods

### Molecular Matching Score

In general, the molecular Matching Score was calculated by dividing the number of alterations matched in each patient (numerator) by the number of characterized aberrations in that patient's tumor (denominator, several mutations in the same genes counted as one aberration; all variants of unknown significance were excluded). Detailed information on Matching Score calculations has been previously published. (28) The same formulas were followed except that herein, each altered component of the cell cycle pathway was counted separately rather than as a single unit, e.g., if a patient had both *CDK4* amplification and *CDKN2A/B* loss, they were counted separately. As an example, for calculating Matching Score, if a patient who had a cancer harboring eight genomic aberrations received two drugs that targeted four of the patient's genomic alterations, the molecular Matching Score would be 4/8 or 50%. Certain drugs that targeted more than one alteration (because small molecule inhibitors often have activity against multiple kinases) were counted as matches for each identified genomic alteration that was matched. It should be noted that, for small molecule inhibitors, matching was based on a half maximal inhibitory concentration (IC50) of the drug for the target (generally, <100 nM) or for effectors immediately downstream of the gene product altered. Antibodies were considered matched if their primary target was the product of the molecular alteration. PARP inhibitors and platinum agents were considered matched to alterations that affected BRCA-related pathways. Additional rules applied. If the patient was treated with immunotherapy, the molecular Matching Score was 100% for PD-L1 immunohistochemistry (IHC) high/intermediate positive, high tumor mutation burden (TMB), or high microsatellite instability (MSI) results. If PD-L1 IHC was low positive or the TMB was intermediate, the molecular Matching Score was 50%. The cut-off of 50% for the analyses of low versus high molecular Matching Scores was chosen according to the minimum P-value criteria (41). It should be noted that, with the use of targeted therapies, a high ( $\geq 50\%$ ) Matching Score could be achieved in the rare patient with a single alteration in the cell cycle pathway if that alteration was targeted (Matching Score = 100%) or in patients with few alterations in the

pathway, if only the cell cycle alteration was targeted; a high Matching Score was achieved in three patients in this way. Otherwise, patients with multiple genomic co-alterations could only achieve a high Matching Score if a matched combination therapy was given that targeted the majority of the co-alterations along with the cell cycle gene alterations. Three of the six patients who had a high Matching Score with immune checkpoint blockade in their regimen would have had a high Matching Score even if the immune checkpoint blockade was excluded. No treated patient had a co-existing cell-cycle resistant alteration such as an *RB* or *CCNE1* alteration (**Supplemental Table 1**). Matching Scores were calculated while blinded to patient outcome.

# SUPPLEMENTARY INFORMATION

**Supplemental Table 1.** Characteristics of 40 patients with alterations in *CCND1/2/3*, *CDK4/6* and/or *CDKN2A/B* G1-S phase cell-cycle genes who received CDK4/6 inhibitor-based therapy.

| Study ID | Cancer type              | Tissue NGS report prior to the therapy                                                                                                                                                  | Regimen                | Matching Score (%) | Matching Score Calculation | Line of therapy      | PFS (months) |
|----------|--------------------------|-----------------------------------------------------------------------------------------------------------------------------------------------------------------------------------------|------------------------|--------------------|----------------------------|----------------------|--------------|
| 10       | Lung, non-small cell     | <i>CDK4</i> amplification, <i>MDM2</i> amplification                                                                                                                                    | abemaciclib            | ≥50%               | 1/2=50%                    | 1 <sup>st</sup> line | 6.1          |
| 64       | Brain                    | <i>AKT3</i> amplification, <i>EGFR</i> amplification, <i>PIK3CG</i> V274I, <i>CDK6</i> amplification, <i>TP53</i> P190L, <i>DPP6-ETV1</i> potential fusion                              | palbociclib            | <50%               | 1/6=17%                    | 4 <sup>th</sup> line | 2            |
| 89       | Brain                    | <i>EGFR</i> A289D, <i>ATM</i> splice site 4612-2A>C, <i>CDK4</i> amplification, <i>CDKN2A/B</i> loss, <i>MDM4</i> amplification                                                         | palbociclib            | <50%               | 2/5=40%                    | 6 <sup>th</sup> line | 0.9          |
| 102      | Brain                    | <i>PDGFRA</i> amplification, <i>TP53</i> N131S, <i>CDK4</i> amplification                                                                                                               | palbociclib            | <50%               | 1/3=33%                    | 6 <sup>th</sup> line | 2.8          |
| 141      | GI, non-colorectal       | <i>CDKN2A/B</i> loss, <i>TP53</i> C176F, <i>TP53</i> D61fs*62, <i>EP300</i> P925T<br>Other: <i>TMB-intermediate</i> (6 muts/mb)                                                         | palbociclib/nivolumab  | ≥50%               | 50%+1/(4x2)=62.5%          | 6th line             | 4.6          |
| 202      | Other (liposarcoma)      | <i>CDK4</i> amplification, <i>MDM2</i> amplification, <i>WT1</i> truncation intron 3                                                                                                    | palbociclib            | <50%               | 1/3=33%                    | 2 <sup>nd</sup> line | 8.2          |
| 220      | Lung, non-small cell     | <i>CCND3</i> P203S, <i>CDKN2A</i> p16INK4a R58* and p14ARF P72L, <i>TP53</i> loss exons 10-11, <i>RET</i> truncation intron 11                                                          | palbociclib            | ≥50%               | 2/4=50%                    | 2 <sup>nd</sup> line | 7            |
| 231      | Other (liposarcoma)      | <i>NF1</i> loss exons 2-57, <i>STK11</i> F354L, <i>CDK4</i> amplification, <i>CDKN2A/B</i> loss, <i>MDM2</i> amplification, <i>GULP1-NOTCH1</i> fusion, <i>STAT4</i> truncation exon 16 | palbociclib/everolimus | <50%               | 3/7=42.9%                  | 2 <sup>nd</sup> line | 3.8          |
| 269      | Gynecologic              | <i>CDKN2A/B</i> loss                                                                                                                                                                    | palbociclib            | ≥50%               | 1/1=100%                   | 3 <sup>rd</sup> line | 8            |
| 302      | Hepato-pancreato-biliary | <i>FBXW7</i> E113D, <i>CDKN2A/B</i> loss, <i>AXIN1</i> R395P, <i>TERT</i> promoter -124C>T                                                                                              | palbociclib            | <50%               | 1/4=25%                    | 4 <sup>th</sup> line | 1.1          |
| 310      | Head & neck cancer       | <i>CDKN2A/B</i> loss, <i>CYLD</i> S371*                                                                                                                                                 | palbociclib/cetuximab  | ≥50%               | 1/2=50%                    | 6 <sup>th</sup> line | 5.8          |
| 315      | Head & neck cancer       | <i>PIK3CA</i> amplification, <i>PTEN</i> Q298*, <i>CDKN2A</i> p16INK4a D84Y and p14ARF R98L, <i>PRKCI</i> D396E, <i>SOX2</i> amplification, <i>TP53</i> Q144*, <i>NFE2L2</i> W8C        | palbociclib/cetuximab  | <50%               | 1/7=14.3%                  | 2 <sup>nd</sup> line | 6.3          |

|     |                          |                                                                                                                                                                                                                                                                                                |                                                      |      |                   |                      |      |
|-----|--------------------------|------------------------------------------------------------------------------------------------------------------------------------------------------------------------------------------------------------------------------------------------------------------------------------------------|------------------------------------------------------|------|-------------------|----------------------|------|
| 327 | Brain                    | <i>EGFR</i> amplification, <i>EGFRvIVa</i> , <i>CDKN2A</i> loss p16INK4a and p14ARF exons 2-3, <i>PIK3R1</i> N453del, <i>QKI</i> E135fs*5, <i>SETD2</i> splice site 5016-2_5018delAGAAA, <i>TERT</i> promoter -124C>T                                                                          | abemaciclib/nivolumab/bevacizumab/osimertinib        | <50% | 2/7=28.6%         | 4 <sup>th</sup> line | 0.6  |
| 334 | Head & neck cancer       | <i>BRIP1</i> N196S, <i>TSC1</i> S575fs*12, <i>CDKN2A/B</i> loss                                                                                                                                                                                                                                | palbociclib                                          | <50% | 1/3=33.3%         | 5 <sup>th</sup> line | 0.6  |
| 351 | Hepato-pancreato-biliary | <i>AKT2</i> amplification, <i>KRAS</i> G12R, <i>TP53</i> splice site 919+1G>A, <i>CDKN2A/B</i> loss                                                                                                                                                                                            | palbociclib/ nab-paclitaxel                          | <50% | 1/4=25%           | 3 <sup>rd</sup> line | 1.9  |
| 391 | Gynecologic              | <i>CDKN2A</i> p14ARF P72L and p16INK4a R58*, <i>FRS2</i> amp, <i>MDM2</i> amp                                                                                                                                                                                                                  | palbociclib/lenvatinib/astrozole/doxorubicin         | ≥50% | 2/3=66.7%         | 3 <sup>rd</sup> line | 6.2  |
| 394 | Lung, non-small cell     | <i>EGFR</i> exon 19 deletion (E746_A750del), <i>CTNNB1</i> S37F, <i>CDKN2A/B</i> loss                                                                                                                                                                                                          | palbociclib/osimertinib                              | ≥50% | 2/3=66.7%         | 6 <sup>th</sup> line | 4.6  |
| 404 | Other (liposarcoma)      | <i>AKT1</i> amplification, <i>CDK4</i> amplification, <i>MDM2</i> amplification, <i>CDC73</i> rearrangement intron 14, <i>FRS2</i> amplification, <i>ZRSR2</i> R446_R448>R                                                                                                                     | palbociclib/lenvatinib                               | <50% | 2/6=33.3%         | 1 <sup>st</sup> line | 3.5  |
| 416 | GI, colorectal           | <i>KRAS</i> G12D, <i>APC</i> K1165*, <i>APC</i> P1373fs*10, <i>CDKN2A</i> p14ARF S73R, <i>SOX9</i> Y420*, <i>TP53</i> R110L                                                                                                                                                                    | palbociclib/trametinib/sulindac                      | ≥50% | 3/5=60%           | 2 <sup>nd</sup> line | 6.8  |
| 424 | Other (chondrosarcoma)   | <i>CDKN2A/B</i> loss exon 2, <i>SETD2</i> splice site 4455-2_4456delAGAA<br>Other: Progesterone-receptor positive by immunohistochemistry                                                                                                                                                      | palbociclib/lenvatinib/astrozole                     | ≥50% | 2/3=66.7%         | 5 <sup>th</sup> line | 3.7+ |
| 425 | Brain                    | <i>CDKN2A/B</i> loss, <i>EGFR</i> amplification, <i>EGFR</i> G598V, <i>PIK3R1</i> I571fs*31, <i>TERT</i> promoter -124C>T                                                                                                                                                                      | palbociclib/lapatinib/metformin/cetuximab/nelfinavir | ≥50% | 3/5=60%           | 2 <sup>nd</sup> line | 1.3  |
| 443 | Hepato-pancreato-biliary | <i>MDM2</i> amplification, <i>CDKN2A</i> p16INK4a R80* and p14ARF P94L, <i>CEBPA</i> G103_G104del, <i>FRS2</i> amplification                                                                                                                                                                   | palbociclib/lenvatinib                               | ≥50% | 2/4=50%           | 1 <sup>st</sup> line | 11.5 |
| 448 | Hepato-pancreato-biliary | <i>PTCH1</i> V1131M, <i>ARID1A</i> R1026fs*13, <i>BAP1</i> D672G, <i>CDKN2A/B</i> loss                                                                                                                                                                                                         | palbociclib/nivolumab/vismodegib/olaparib            | ≥50% | 3/4=75%           | 3 <sup>rd</sup> line | 1.6  |
| 450 | Head & neck cancer       | <i>BRCA1</i> R1744*, <i>CDKN2A/B</i> loss, <i>SMAD4</i> loss exons 1-10, <i>TP53</i> E258G, <i>TP53</i> R156G, <i>TP53</i> Y220C                                                                                                                                                               | palbociclib/cetuximab                                | <50% | 1/5=20%           | 4 <sup>th</sup> line | 4.5  |
| 459 | GI, non-colorectal       | <i>TSC2</i> splice site 2967-2A>T, <i>MYC</i> amplification, <i>RICTOR</i> amplification, <i>CCND3</i> amplification, <i>CTCF</i> rearrangement exon 11, <i>MYST3</i> amplification, <i>TP53</i> R175H, <i>VEGFA</i> amplification<br>Other: PD-L1 5% positive by IHC (tumor proportion score) | Palbociclib/nivolumab/bevacizumab                    | ≥50% | 50%+3/(8x2)=68.8% | 1 <sup>st</sup> line | 8    |

|     |                                      |                                                                                                                                                                                                                                                                                                                     |                                    |      |                   |                       |       |
|-----|--------------------------------------|---------------------------------------------------------------------------------------------------------------------------------------------------------------------------------------------------------------------------------------------------------------------------------------------------------------------|------------------------------------|------|-------------------|-----------------------|-------|
| 464 | Head & neck cancer                   | <i>EGFR</i> amplification, <i>CCND1</i> amplification, <i>CDKN2A</i> p16INK4a W110* and p14ARF G125R, <i>SUFU</i> splice site 1158-1G>T, <i>FAT1</i> A1564fs*10, <i>FGF19</i> amplification, <i>FGF3</i> amplification, <i>FGF4</i> amplification, <i>TP53</i> splice site 375G>T, <i>TP53</i> splice site 376-1G>A | palbociclib/cetuximab              | <50% | 3/10=30%          | 1 <sup>st</sup> line  | 1.8   |
| 466 | GI, colorectal                       | <i>BRCA2</i> S3332Y, <i>CCND2</i> amplification, <i>STK11</i> loss exon 1, <i>CDKN2A</i> p16INK4a A68T and p14ARF R82H, <i>FGF23</i> amplification, <i>FGF6</i> amplification, <i>KDM5A</i> amplification, <i>SMAD4</i> loss exons 1-10, <i>TP53</i> splice site 376-1G>C                                           | palbociclib/olaparib/bevacizumab   | <50% | 4/9=44.4%         | 4 <sup>th</sup> line  | 0.7   |
| 474 | Head & neck cancer                   | <i>CCND1</i> amplification, <i>CDKN2A/B</i> loss, <i>FGF19</i> amplification, <i>FGF3</i> amplification, <i>FGF4</i> amplification, <i>KMT2C (MLL3)</i> M3463fs*32, <i>TP53</i> l255del<br>Other: PD-L1 1% positive by IHC (tumor proportion score)                                                                 | palbociclib/nivolumab/lenvatinib   | ≥50% | 50%+6/(7x2)=92.9% | 1 <sup>st</sup> line  | 2.6   |
| 477 | GI, non-colorectal                   | <i>CCND1</i> amplification, <i>FGF19</i> amplification, <i>FGF3</i> amplification, <i>FGF4</i> amplification, <i>PMS2</i> N371fs*2, <i>TP53</i> S241F, <i>TP53</i> splice site 993G>A                                                                                                                               | palbociclib/everolimus/bevacizumab | <50% | 2/6=33.3%         | 2 <sup>nd</sup> line  | 6.8   |
| 482 | Hepato-pancreato-biliary             | <i>KRAS</i> Q61H, <i>CDKN2A/B</i> loss, <i>FAM123B</i> E370*, <i>GATA6</i> amplification, <i>GNAS</i> R201C, <i>SMAD4</i> R135*                                                                                                                                                                                     | palbociclib/trametinib/anakinra    | ≥50% | 3/6=50%           | 2 <sup>nd</sup> line  | 1.7   |
| 488 | Gynecologic                          | <i>FLT4</i> amplification, <i>PDGFRB</i> amplification, <i>CDK6</i> amplification, <i>FGFR4</i> amplification, <i>TP53</i> K132R                                                                                                                                                                                    | palbociclib/lenvatinib             | ≥50% | 4/5=80%           | 12 <sup>th</sup> line | 10.8+ |
| 489 | Other (carcinoma of unknown primary) | <i>PTEN</i> loss exons 1-2, <i>STK11</i> Q214*, <i>CDKN2A</i> p16INK4a I49T, <i>SMAD4</i> loss<br>Other: PD-L1 60% positive by IHC (tumor proportion score)                                                                                                                                                         | palbociclib/nivolumab/temsirolimus | ≥50% | 50%+3/(4x2)=87.5% | 1 <sup>st</sup> line  | 10.4  |
| 490 | Hepato-pancreato-biliary             | <i>KRAS</i> G12D, <i>CDK6</i> amplification, <i>CDKN2A/B</i> loss, <i>KDM6A</i> V326fs*38, <i>TP53</i> S127F, <i>ZNF703</i> amplification<br>Other: PD-L1 5% positive by IHC (tumor proportion score)                                                                                                               | palbociclib/pembrolizumab          | ≥50% | 50%+2/(6x2)=66.7% | 2 <sup>nd</sup> line  | 0.8   |
| 501 | GI, non-colorectal (GIST)            | <i>BRAF</i> V600E, <i>CDKN2A</i> p16INK4a splice site 150+1G>A, <i>LRP1B</i> deletion exon 23                                                                                                                                                                                                                       | palbociclib/dabrafenib/trametinib  | ≥50% | (2+1)/(3+1)=75%   | 11 <sup>th</sup> line | 11.3  |
| 502 | Hepato-pancreato-biliary             | <i>KRAS</i> G12D, <i>KRAS</i> G12R, <i>CDKN2A</i> loss exons 1-2 and <i>CDKN2B</i> loss, <i>SMAD4</i> deletion exon 11, <i>TP53</i> R267W                                                                                                                                                                           | palbociclib/trametinib/bevacizumab | ≥50% | 2/3=66.7%         | 1 <sup>st</sup> line  | 17.5  |

|     |                                      |                                                                                                                                                                                                  |                                                  |      |                 |                      |      |
|-----|--------------------------------------|--------------------------------------------------------------------------------------------------------------------------------------------------------------------------------------------------|--------------------------------------------------|------|-----------------|----------------------|------|
| 503 | Hepato-pancreato-biliary             | <i>KRAS</i> G12D, <i>CDKN2A</i> p16INK4a E27*, <i>GNAS</i> R201H, <i>TP53</i> splice site 919+2T>G                                                                                               | palbociclib/trametinib/b<br>evacizumab           | ≥50% | 4/4=100%        | 2 <sup>nd</sup> line | 2.3  |
| 504 | Hepato-pancreato-biliary             | <i>ERBB2</i> amplification, <i>KRAS</i> G12D, <i>CDKN2A</i> p16INK4a R80* and p14ARF P94L, <i>FAM123B</i> Q349fs*29, <i>RARA-WIPF2</i> fusion, <i>TOP2A</i> amplification, <i>TP53</i> Q100fs*23 | palbociclib/trastuzumab<br>/lapatinib/trametinib | ≥50% | (3+1)/(7+1)=50% | 4 <sup>th</sup> line | 4    |
| 505 | Hepato-pancreato-biliary             | <i>CDKN2A</i> R80*, <i>KRAS</i> G12D, <i>SMARCB1</i> R201Q, <i>NF2</i> 1126S                                                                                                                     | Palbociclib/trametinib/a<br>nakinra              | ≥50% | 3/4=75%         | 3 <sup>rd</sup> line | 9.2  |
| 506 | Other (osteosarcoma)                 | <i>CDK4</i> amplification, <i>CCND2</i> amplification, <i>MDM2</i> amplification, <i>FGF23</i> amplification, <i>FGF6</i> amplification, <i>FRS2</i> amplification                               | palbociclib/lenvatinib                           | ≥50% | 5/6=83.3%       | 3 <sup>rd</sup> line | 31.2 |
| 507 | Other (carcinoma of unknown primary) | <i>EGFR</i> amplification, <i>APC</i> L1129S, <i>CDKN2A</i> H83Y, <i>PDGFRA</i> N33Y                                                                                                             | palbociclib/cetuximab/er<br>lotinib/sulindac     | ≥50% | (3+1)/(4+1)=80% | 2 <sup>nd</sup> line | 4    |

**Abbreviations:** ECOG-PS, Eastern Cooperative Oncology Group Performance Status; GI, gastrointestinal cancers; IHC, immunohistochemistry; PFS, progression-free survival.
